# Supplementary material for: A comparison study between V-SBA-15 and V-KIT-6 catalysts for selective oxidation of diphenylmethane
Source: Royal Society of Chemistry journal article supplement (doi:10.1039/c9nj02007a), 2019-01-01
Supplement: c9nj02007a1.pdf [file c9nj02007a1.pdf]

## Supplementary Information

### **A comparison study between V-SBA-15 and V-KIT-6 catalysts for selective oxidation of diphenylmethane**

D. Santharaj,<sup>\*[a]</sup> K. Shanthi<sup>\*\*[b]</sup>, C. Suresh<sup>[c]</sup>, A. Selvamani<sup>[b]</sup>

[a] Department of Chemistry, Loyola College, Chennai 600 034. Tamilnadu, India  
E-mail: [santhanaraj@loyolacollege.edu](mailto:santhanaraj@loyolacollege.edu)

[b] Prof. K. Shanthi  
Department of Chemistry  
Anna University, Chennai 600 025. Tamilnadu, India

[c] Dr. C. Suresh  
Electrodics and Electrocatalysis Division,  
CSIR-Central Electrochemical Research Institute,  
Karaikudi 630 006, Tamilnadu, India

\*Corresponding author. +91 7092053305

E-mail address: [santhanaraj@loyolacollege.edu](mailto:santhanaraj@loyolacollege.edu)

## Preparation of the catalysts

The V-SBA-15 (25) catalyst were synthesized by hydrothermally using ammonium metavanadate as a vanadium source. About 3.89 g triblock copolymer poly (ethylene glycol)-block-poly (propylene glycol)-block-poly (ethylene glycol)-(Pluronic P123, molecular weight = 5,800, EO<sub>20</sub>-PO<sub>70</sub>-EO<sub>20</sub>, ALDRICH, USA) was dissolved in 30.0 g of distilled water and stirred for 3 h. Required amount of Tetraethyl orthosilicate (TEOS, MERCK 98%, USA) and amount of ammonium metavanadate (NH<sub>4</sub>VO<sub>3</sub>, SRL 97%, INDIA) were added directly to the polymer containing homogenous solution. The pH of the solution was adjusted to 3 by using 0.3 M HCl. The gel was transferred into the autoclave and heated for 24 h at 373 K for 48 h. The green solid was washed with distilled water and dried at 343 K for 12 h. The material was calcined at 773 K for 6 h. The same procedure was followed for V-KIT-6 catalyst, the only difference was the additional use of a co-surfactant (butanol).

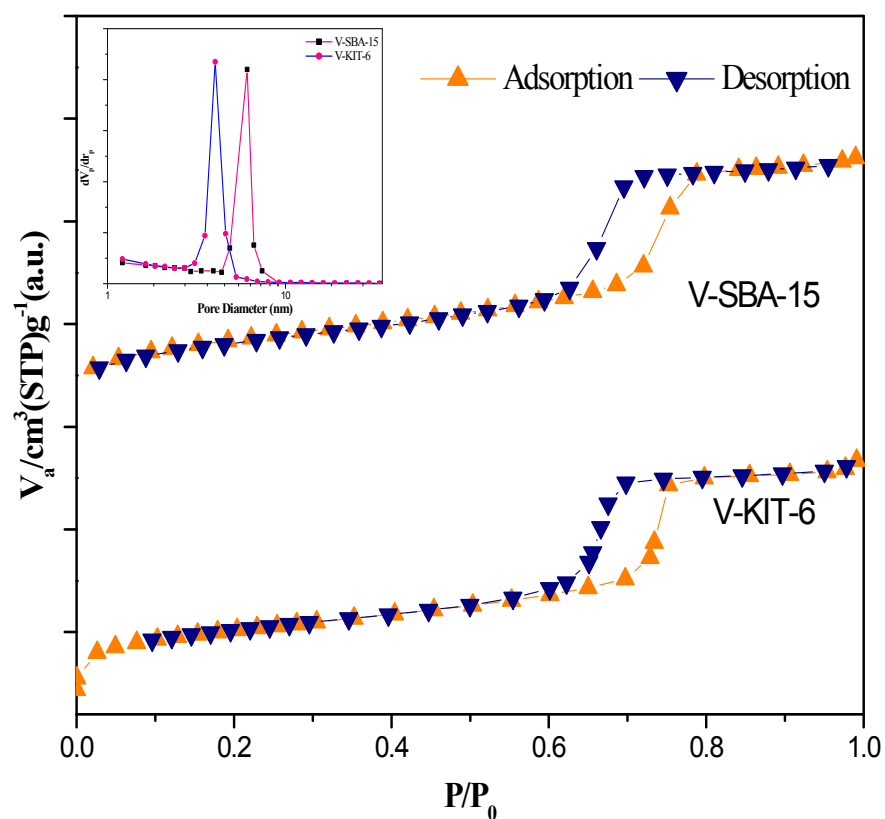

**Figure S1** N<sub>2</sub> adsorption-desorption isotherms of Si-KIT-6 and V-KIT-6 catalysts; (BJH plot inserted in the Figure)

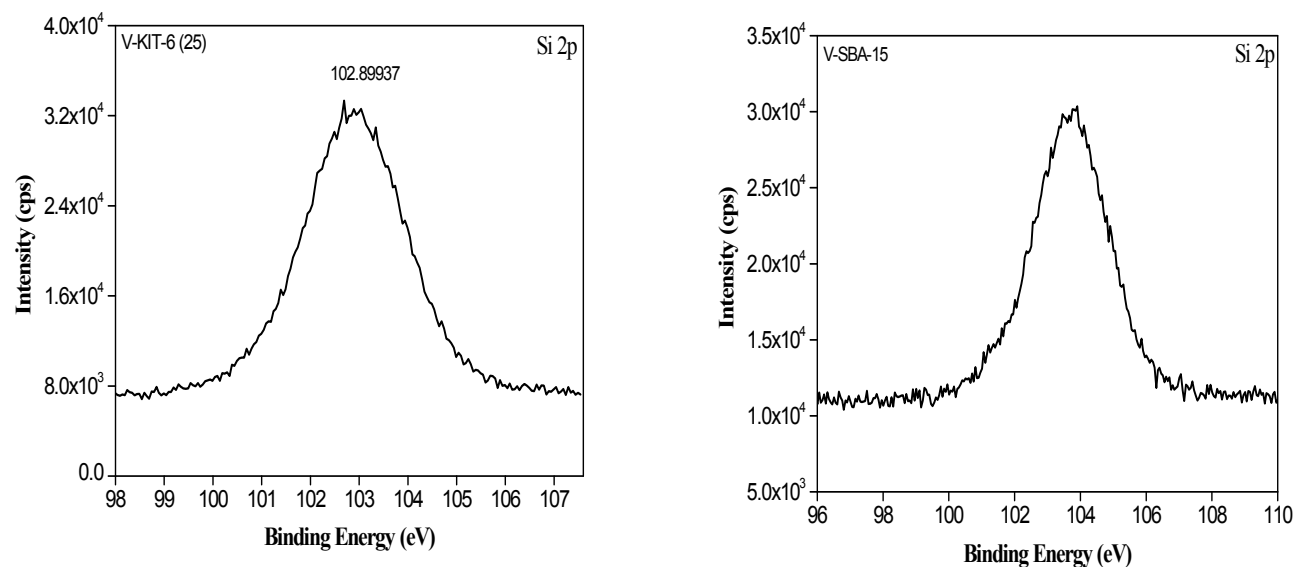

**Figure S2** XPS spectra of Si<sub>2</sub>P<sub>3/2</sub> region of calcined V-KIT-6 and V-SBA-15 catalysts

**Table S1** Textural properties of the catalysts

| Catalysts | Vanadium content (wt.%) | 'd' spacing | Wall thickness <sup>a</sup> (nm) | Unit cell parameter ( $a_0$ ) |
|-----------|-------------------------|-------------|----------------------------------|-------------------------------|
| V-SBA-15  | 3.1                     | 10.375      | 5.6                              | 12.02 <sup>b</sup>            |
| V-KIT-6   | 3.2                     | 9.74        | 7.3                              | 23.85 <sup>c</sup>            |

<sup>a</sup>Wall thickness = Unit cell parameter – Pore diameter

$$a_0 = \frac{2d_{(100)}}{\sqrt{3}}$$

<sup>b</sup>Unit cell parameter values calculated using

<sup>c</sup>Unit cell parameter values calculated using  $a_0 = \sqrt{6} d_{(211)}$
